# Supplementary material
Source: PubMed Central journal article supplement (PMC3416008)
Supplement: supp_112.140228_140228SI.pdf [file supp_112.140228_140228SI.pdf]

**File S1**  
**Supporting Information**

**Forward-backward algorithm for the proposed infinite HMM** A variant of the beam sampling algorithm for infinite HMM (VAN GAEL *et al.* 2008) is employed to improve the convergence over standard Gibbs sampling. Specifically, we introduce auxiliary variables  $u_t$  for  $t = 0, \dots, T - 1$ :

$$\begin{aligned} u_{i0} \mid S_{i0} = (k, j) &\sim \text{Uniform}(0, \nu_{jk}\eta_{ij}) \\ u_{it} \mid S_{it} = (k, j), S_{i,t-1} = (k', j') &\sim \text{Uniform}(0, q_{it}) \quad \text{for } t = 1, \dots, T - 1 \end{aligned}$$

where

$$q_{it} = e^{-G_t^r d_t} e^{-g_{jt}^r d_t} I(k = k') I(j = j') + e^{-G_t^r d_t} (1 - e^{-g_{jt}^r d_t}) I(j = j') \pi_{k'k}^j + (1 - e^{-G_t^r d_t}) \nu_{jk} \eta_j$$

For notational convenience, we omit the notation  $i$ . Let the forward probabilities be  $\alpha_t(k, j) = P(S_t = (k, j) \mid H_{0:t}, u_{0:t})$ . Then

$$\begin{aligned} \alpha_0(k, j) &\propto P(S_0 = (k, j), H_0, u_0) \propto P(S_0 = (k, j)) P(u_0 \mid S_0 = (k, j)) P(H_0 \mid C_0 = k) \\ &= I(u_0 < \nu_{jk} \eta_{Z_0}) P(H_0 \mid C_0 = k) \\ \alpha_t(k, j) &\propto \sum_{k', j'} P(S_t = (k, j), S_{t-1} = (k', j'), H_t, u_t \mid H_{0:t-1}, u_{0:t-1}) \\ &\propto P(H_t \mid C_t = k) \sum_{k', j'} P(u_t \mid S_t = (k, j), S_{t-1} = (k', j')) P(S_t = (k, j) \mid S_{t-1} = (k', j')) \alpha_{t-1}(k', j') \\ &\propto P(H_t \mid C_t = k) \sum_{j'=0}^{J-1} \sum_{k'=0}^{\infty} I(u_t < P(S_t = (k, j) \mid S_{t-1} = (k', j'))) \alpha_{t-1}(k', j') \end{aligned} \tag{A1}$$

Given  $u_0, \dots, u_{T-1}$ , the number of states  $k$  such that  $\alpha_t(k, j) > 0$  for  $t = 0, \dots, T - 1$  is finite: for  $t = 0$ , the number of  $k$  such that  $\nu_{jk} > u_0$  is finite for any  $j$  since  $\sum_k \nu_{jk} = 1$  with  $\nu_{jk} \geq 0$ , and recursively, we can see the number of  $k$  with  $\alpha_t(k, j) > 0$  is finite. Therefore, the infinite sum over the previous states in the calculation of forward probability reduces to

a finite sum.

$C_{T-1}$  and  $Z_{T-1}$  can be sampled from  $\alpha_{T-1}(k, j)$ . Then for  $t = T - 2, \dots, 0$ , we sample  $C_t$  and  $Z_t$  using

$$P(C_t, Z_t \mid H_{0:T-1}, u_{0:T-1}, C_{t+1}, Z_{t+1}) \propto P(C_{t+1}, Z_{t+1} \mid C_t, Z_t) \alpha_t(C_t, Z_t) P(u_{t+1} \mid S_t, S_{t+1})$$

If we reduce the model to the training phase, we can treat the variable  $Z$  as observed.

Therefore, the forward probabilities are written as follows:

$$\begin{aligned} \alpha_0(k) &\propto P(C_0 = k, H_0, u_0) \propto P(C_0 = k) P(u_0 \mid C_0 = k) P(H_0 \mid C_0 = k) \\ &= I(u_0 < \nu_{Z_0 k} \eta_j) P(H_0 \mid C_0 = k) \\ \alpha_t(k) &\propto \sum_{k'} P(C_t = k, C_{t-1} = k', H_t, u_t \mid H_{0:t-1}, u_{0:t-1}) \\ &\propto P(H_t \mid C_t = k) \sum_{k'} P(u_t \mid C_t = k, C_{t-1} = k') P(C_t = k \mid C_{t-1} = k') \alpha_{t-1}(k') \\ &\propto P(H_t \mid C_t = k) \sum_{k'=0}^{\infty} I(u_t < P(C_t = k \mid C_{t-1} = k')) \alpha_{t-1}(k') \end{aligned} \quad (\text{A2})$$

Once we get the trained parameters, we restrict the model to a finite state space, so we don't need to incorporate the auxiliary variables  $u$ , so the standard form of forward-backward probabilities can be used.
